# Supplementary material for: Gender Variation in the Shape of Superior Talar Dome: A Cadaver Measurement Based on Chinese Population
Source: Hindawi journal article supplement (doi:10.1155/2018/6087871), 2018-07-04
Supplement: f1 [file 6087871.f1.zip]

| Talus | Side | Gender | Age | Observer | TL    | TW    | DAW   | DMW   | DPW   | DL    |
|-------|------|--------|-----|----------|-------|-------|-------|-------|-------|-------|
| 1     | L    | F      | 56  | A1       | 47.48 | 36.34 | 25.92 | 21.88 | 16.12 | 27.66 |
|       |      |        |     | A2       | 48.38 | 37.02 | 23.96 | 22.92 | 17.18 | 28.56 |
|       |      |        |     | B1       | 46.46 | 37.48 | 25.04 | 23.06 | 17.2  | 26.62 |
|       |      |        |     | B2       | 47.42 | 38.42 | 24.18 | 21.02 | 18.06 | 27.6  |
| 2     | L    | F      | 48  | A1       | 51.74 | 40.82 | 31.6  | 27.94 | 20.88 | 32.06 |
|       |      |        |     | A2       | 53.72 | 43.12 | 29.48 | 27.86 | 21.94 | 33.16 |
|       |      |        |     | B1       | 53.68 | 42.04 | 31.54 | 26.02 | 22.04 | 31.18 |
|       |      |        |     | B2       | 52.76 | 43.22 | 30.5  | 26.98 | 21.08 | 30.22 |
| 3     | L    | F      | 62  | A1       | 47.78 | 38.02 | 29.78 | 25.46 | 18.22 | 29.32 |
|       |      |        |     | A2       | 48.74 | 37.96 | 28.62 | 26.5  | 17.18 | 31.5  |
|       |      |        |     | B1       | 47.8  | 36.74 | 26.52 | 24.38 | 19.32 | 30.48 |
|       |      |        |     | B2       | 46.88 | 36.04 | 26.96 | 23.96 | 18.28 | 31.34 |
| 4     | L    | M      | 71  | A1       | 53.12 | 40.26 | 34.4  | 32.2  | 27.54 | 34.04 |
|       |      |        |     | A2       | 54.06 | 42.18 | 33.48 | 31.16 | 26.58 | 36.12 |
|       |      |        |     | B1       | 52.96 | 41.16 | 32.54 | 30.14 | 28.64 | 35.2  |
|       |      |        |     | B2       | 53.02 | 40.2  | 31.46 | 31.04 | 26.68 | 34.16 |
| 5     | L    | M      | 63  | A1       | 47.82 | 36.9  | 27    | 25.08 | 23.62 | 31.94 |
|       |      |        |     | A2       | 48.8  | 35.76 | 26.96 | 26.14 | 21.7  | 31.02 |
|       |      |        |     | B1       | 47.76 | 36.88 | 28.86 | 28.06 | 20.64 | 33.88 |
|       |      |        |     | B2       | 47.06 | 36.04 | 26.92 | 27.08 | 22.58 | 32.98 |
| 6     | R    | M      | 59  | A1       | 51.1  | 42.32 | 33.48 | 30.38 | 27.12 | 37.78 |
|       |      |        |     | A2       | 52.2  | 43.9  | 34.56 | 31.26 | 29.08 | 39.96 |
|       |      |        |     | B1       | 50.98 | 43.02 | 32.5  | 29.34 | 27.12 | 38.92 |
|       |      |        |     | B2       | 51.06 | 42.98 | 33.62 | 31.4  | 26.98 | 37.84 |
| 7     | L    | F      | 57  | A1       | 46.58 | 38.68 | 27.22 | 25.96 | 17.06 | 31.12 |
|       |      |        |     | A2       | 47.66 | 37.7  | 28.08 | 24.04 | 16.14 | 32.04 |
|       |      |        |     | B1       | 48.64 | 36.74 | 28.73 | 23.9  | 18.18 | 31.08 |
|       |      |        |     | B2       | 47.66 | 38.8  | 29.02 | 24.98 | 16.08 | 29.96 |
| 8     | R    | M      | 68  | A1       | 51.78 | 42.3  | 34.94 | 31.16 | 27.96 | 34.8  |
|       |      |        |     | A2       | 51.14 | 42.74 | 33.06 | 30.04 | 28.86 | 35.66 |
|       |      |        |     | B1       | 51.8  | 41.92 | 32.88 | 31.14 | 29.84 | 34.78 |
|       |      |        |     | B2       | 52.06 | 42.82 | 33.02 | 29.02 | 28.02 | 35.6  |

|    |   |   |    |    |       |       |       |       |       |       |
|----|---|---|----|----|-------|-------|-------|-------|-------|-------|
| 9  | R | F | 55 | A1 | 48.94 | 38.86 | 24.92 | 23.96 | 16.12 | 30.18 |
|    |   |   |    | A2 | 48.28 | 39.02 | 26.1  | 24.02 | 18.28 | 29.04 |
|    |   |   |    | B1 | 48.82 | 38.18 | 24.68 | 23.88 | 17.24 | 28.08 |
|    |   |   |    | B2 | 48.06 | 38.72 | 23.94 | 25.84 | 16.08 | 27.16 |
| 10 | R | M | 67 | A1 | 52.86 | 41.74 | 33.1  | 31.38 | 27.38 | 35.56 |
|    |   |   |    | A2 | 52.22 | 42.82 | 32.44 | 29.16 | 24.96 | 34.6  |
|    |   |   |    | B1 | 53.04 | 41.86 | 33.32 | 28.24 | 25.4  | 36.68 |
|    |   |   |    | B2 | 52.36 | 40.98 | 34.38 | 30.28 | 26.26 | 35.5  |
| 11 | R | M | 60 | A1 | 51.66 | 42.1  | 31.24 | 27.02 | 25.1  | 33.94 |
|    |   |   |    | A2 | 51.12 | 41.76 | 33.18 | 28.98 | 26.14 | 34.86 |
|    |   |   |    | B1 | 52.46 | 40.5  | 32.22 | 28.94 | 24.98 | 35.14 |
|    |   |   |    | B2 | 51.92 | 41.4  | 31.3  | 36.88 | 25.04 | 36.1  |
| 12 | L | M | 26 | A1 | 58.7  | 45.5  | 33.48 | 29.96 | 28.46 | 35.76 |
|    |   |   |    | A2 | 60.1  | 44.72 | 34.52 | 31.76 | 27.38 | 37.44 |
|    |   |   |    | B1 | 58.94 | 45.62 | 35.62 | 31.02 | 29.42 | 36.64 |
|    |   |   |    | B2 | 59.08 | 44.46 | 33.46 | 30.1  | 27.32 | 37.58 |
| 13 | L | M | 46 | A1 | 52.96 | 44.42 | 31.76 | 28.48 | 26.84 | 33.26 |
|    |   |   |    | A2 | 53.08 | 45.52 | 33.76 | 31.6  | 25.9  | 34.18 |
|    |   |   |    | B1 | 52.88 | 43.66 | 31.84 | 28.42 | 27.98 | 35.4  |
|    |   |   |    | B2 | 53.12 | 44.7  | 30.68 | 29.38 | 26.02 | 34.22 |
| 14 | L | F | 56 | A1 | 45.86 | 37.96 | 27.02 | 25.06 | 18.52 | 28.66 |
|    |   |   |    | A2 | 45.28 | 38.78 | 25.96 | 23.92 | 19.6  | 29.58 |
|    |   |   |    | B1 | 46.34 | 38.06 | 26.88 | 24.1  | 18.48 | 28.74 |
|    |   |   |    | B2 | 45.6  | 38.7  | 25.08 | 23.04 | 17.4  | 30.64 |
| 15 | R | M | 65 | A1 | 54.9  | 41.78 | 36.88 | 34.94 | 30.6  | 40.34 |
|    |   |   |    | A2 | 54.16 | 40.92 | 38.96 | 35.88 | 31.76 | 39.18 |
|    |   |   |    | B1 | 53.92 | 40.8  | 37.02 | 34.92 | 32.88 | 38.28 |
|    |   |   |    | B2 | 54.54 | 41.02 | 36.94 | 36.04 | 30.76 | 39.24 |
| 16 | R | F | 58 | A1 | 45.78 | 38.94 | 27.2  | 25.32 | 18.88 | 30.94 |
|    |   |   |    | A2 | 45.1  | 37.02 | 29.36 | 26.26 | 20.74 | 31.02 |
|    |   |   |    | B1 | 46.02 | 39.08 | 27.24 | 25.18 | 19.68 | 30.86 |
|    |   |   |    | B2 | 45.68 | 38.1  | 26.18 | 24.36 | 19.3  | 29.76 |

|    |   |   |    |    |       |       |       |       |       |       |
|----|---|---|----|----|-------|-------|-------|-------|-------|-------|
| 17 | R | M | 53 | A1 | 55.16 | 47.66 | 33.78 | 32.54 | 28.68 | 36.52 |
|    |   |   |    | A2 | 55.94 | 46.86 | 33.26 | 31.42 | 29.84 | 34.64 |
|    |   |   |    | B1 | 55.78 | 47.62 | 34.04 | 32.3  | 30.72 | 35.34 |
|    |   |   |    | B2 | 55    | 46.7  | 35.96 | 33.36 | 28.6  | 36.24 |
| 18 | R | M | 63 | A1 | 56.26 | 48.02 | 36.78 | 35.26 | 29.86 | 38.82 |
|    |   |   |    | A2 | 56.48 | 47.94 | 35.86 | 34.38 | 31.94 | 39.94 |
|    |   |   |    | B1 | 56.8  | 49.98 | 34.68 | 32.12 | 30.04 | 37.86 |
|    |   |   |    | B2 | 56.52 | 47.88 | 36.74 | 34.24 | 32.08 | 39.56 |
| 19 | L | M | 69 | A1 | 57.26 | 49.78 | 35.98 | 33.66 | 32.62 | 39.08 |
|    |   |   |    | A2 | 58.08 | 48.82 | 37.06 | 34.58 | 30.74 | 37.16 |
|    |   |   |    | B1 | 57.98 | 49.74 | 37.12 | 35.52 | 31.66 | 38.96 |
|    |   |   |    | B2 | 58.06 | 48.88 | 36.98 | 34.74 | 30.82 | 39.4  |
| 20 | R | M | 68 | A1 | 59.96 | 46.94 | 37.28 | 35.6  | 30.38 | 39.48 |
|    |   |   |    | A2 | 58.06 | 47.06 | 36.36 | 33.56 | 31.46 | 38.66 |
|    |   |   |    | B1 | 58.48 | 46.84 | 37.42 | 35.42 | 30.54 | 37.62 |
|    |   |   |    | B2 | 60.32 | 47.78 | 38.38 | 34.48 | 29.48 | 37.2  |
| 21 | R | M | 64 | A1 | 56.98 | 46.74 | 36.86 | 34.36 | 29.64 | 38.38 |
|    |   |   |    | A2 | 56.1  | 47.86 | 35.78 | 33.54 | 28.16 | 36.46 |
|    |   |   |    | B1 | 57.88 | 46.72 | 37.76 | 35.48 | 27.42 | 36.02 |
|    |   |   |    | B2 | 56.92 | 45.8  | 36.92 | 34.6  | 28.82 | 37.54 |
| 22 | R | F | 67 | A1 | 48.08 | 36.78 | 28.38 | 26.72 | 20.28 | 33.96 |
|    |   |   |    | A2 | 47.68 | 35.94 | 29.7  | 25.84 | 19.4  | 32.04 |
|    |   |   |    | B1 | 47.92 | 37.02 | 27.98 | 24.52 | 20.38 | 30.88 |
|    |   |   |    | B2 | 47.26 | 36.84 | 28.6  | 26.74 | 21.46 | 31.96 |
| 23 | R | M | 64 | A1 | 52.2  | 44.78 | 31    | 28.34 | 25.58 | 34.4  |
|    |   |   |    | A2 | 52.72 | 43.92 | 31.98 | 29.3  | 24.32 | 33.32 |
|    |   |   |    | B1 | 53.18 | 44.88 | 30.9  | 27.22 | 23.84 | 35.44 |
|    |   |   |    | B2 | 52.02 | 44.2  | 32.94 | 29.7  | 24.78 | 34.5  |
| 24 | R | M | 36 | A1 | 55.72 | 46.72 | 32.58 | 30.08 | 26.88 | 34.2  |
|    |   |   |    | A2 | 54.76 | 45.46 | 33.66 | 30.62 | 28.76 | 33.16 |
|    |   |   |    | B1 | 55.94 | 47.54 | 34.7  | 31.56 | 27.02 | 35.26 |
|    |   |   |    | B2 | 55.34 | 46.2  | 32.04 | 29.44 | 25.94 | 34.22 |

|    |   |   |    |    |       |       |       |       |       |       |
|----|---|---|----|----|-------|-------|-------|-------|-------|-------|
| 25 | L | M | 48 | A1 | 51.98 | 40.22 | 30.14 | 26.78 | 24.7  | 33.44 |
|    |   |   |    | A2 | 52.12 | 39.98 | 31.98 | 27.56 | 23.74 | 32.86 |
|    |   |   |    | B1 | 52.46 | 40.18 | 30.08 | 28.7  | 24.82 | 33.96 |
|    |   |   |    | B2 | 51.6  | 41.14 | 29.1  | 27.18 | 22.94 | 34.8  |
| 26 | L | M | 63 | A1 | 52.48 | 44.14 | 31.82 | 29.2  | 26.04 | 33.88 |
|    |   |   |    | A2 | 52.86 | 43.24 | 33.78 | 31.18 | 24.98 | 34.9  |
|    |   |   |    | B1 | 52.2  | 44.3  | 32    | 30.26 | 25.1  | 35.84 |
|    |   |   |    | B2 | 53.04 | 43.44 | 31.6  | 29.78 | 24.04 | 33.76 |
| 27 | L | M | 45 | A1 | 58.98 | 49.76 | 37.78 | 34.94 | 31.2  | 41.38 |
|    |   |   |    | A2 | 60.2  | 48.96 | 39.66 | 35.12 | 30.06 | 40.8  |
|    |   |   |    | B1 | 58.34 | 49.04 | 38.52 | 33.18 | 33.16 | 39.78 |
|    |   |   |    | B2 | 59.2  | 49.38 | 37.68 | 35.6  | 32.08 | 40.04 |
| 28 | L | M | 54 | A1 | 53.2  | 42.8  | 31.12 | 28.06 | 25.68 | 34.78 |
|    |   |   |    | A2 | 52.98 | 43.78 | 32.06 | 29.88 | 26.78 | 35.82 |
|    |   |   |    | B1 | 53.42 | 43.9  | 31.62 | 30.02 | 26.74 | 34.3  |
|    |   |   |    | B2 | 52.84 | 43.32 | 33.3  | 31.08 | 27.8  | 33.88 |
| 29 | R | M | 66 | A1 | 54.28 | 45.02 | 34.08 | 31.94 | 26.02 | 36.08 |
|    |   |   |    | A2 | 54.94 | 46.78 | 35.96 | 30.12 | 25.98 | 35.94 |
|    |   |   |    | B1 | 55.04 | 45.84 | 34.04 | 29.46 | 27.94 | 38.16 |
|    |   |   |    | B2 | 54.18 | 44.98 | 33.8  | 32.1  | 28.08 | 37.02 |
| 30 | L | M | 67 | A1 | 53.78 | 45.28 | 31.96 | 27.98 | 23.26 | 34.02 |
|    |   |   |    | A2 | 54.54 | 44.46 | 32.2  | 29.12 | 24.06 | 33.9  |
|    |   |   |    | B1 | 53.72 | 45.58 | 33.88 | 29.66 | 23.98 | 34.7  |
|    |   |   |    | B2 | 53.2  | 46.48 | 31.3  | 28.94 | 25.02 | 34.12 |
| 31 | R | M | 64 | A1 | 53.16 | 42.58 | 32.36 | 29    | 25.3  | 35.38 |
|    |   |   |    | A2 | 53.74 | 41.96 | 33.42 | 29.7  | 26.48 | 34.26 |
|    |   |   |    | B1 | 53.26 | 42.78 | 34.54 | 28.96 | 25.6  | 35.18 |
|    |   |   |    | B2 | 52.9  | 42.3  | 32.84 | 30.16 | 27.54 | 36.28 |
| 32 | R | M | 61 | A1 | 53.74 | 46.48 | 31.58 | 29.92 | 24.12 | 35.66 |
|    |   |   |    | A2 | 53.1  | 45.56 | 33.04 | 28.98 | 23.92 | 34.4  |
|    |   |   |    | B1 | 52.94 | 45.38 | 31.94 | 28.16 | 25.08 | 36.5  |
|    |   |   |    | B2 | 53.82 | 45.02 | 34.18 | 31.9  | 24.68 | 34.98 |

|    |   |   |    |    |       |       |       |       |       |       |
|----|---|---|----|----|-------|-------|-------|-------|-------|-------|
| 33 | R | F | 59 | A1 | 51.32 | 42.24 | 32.08 | 30.04 | 21.88 | 35.66 |
|    |   |   |    | A2 | 50.56 | 41.36 | 33.24 | 31.06 | 23.76 | 34.7  |
|    |   |   |    | B1 | 50.1  | 42.28 | 32.62 | 29.94 | 22.78 | 35.24 |
|    |   |   |    | B2 | 50.84 | 41.54 | 34.22 | 31.1  | 24.62 | 36.68 |
| 34 | R | F | 57 | A1 | 50.14 | 41.24 | 32.04 | 28.86 | 22.18 | 35.62 |
|    |   |   |    | A2 | 49.82 | 42.08 | 29.96 | 26.9  | 22.96 | 33.54 |
|    |   |   |    | B1 | 49.3  | 40.96 | 31.06 | 27.88 | 23.98 | 32.68 |
|    |   |   |    | B2 | 51.08 | 41.5  | 29.28 | 26.12 | 21.22 | 33.08 |
| 35 | R | F | 69 | A1 | 47    | 36.72 | 27.86 | 25.88 | 20.14 | 28.28 |
|    |   |   |    | A2 | 46.94 | 36.2  | 28.74 | 26.76 | 22.06 | 30.46 |
|    |   |   |    | B1 | 47.78 | 37.54 | 27.4  | 25.68 | 21.02 | 29.34 |
|    |   |   |    | B2 | 47.08 | 36.18 | 29.68 | 26.28 | 20.96 | 30.06 |
| 36 | R | F | 38 | A1 | 50.42 | 38.3  | 30.18 | 26.38 | 19.26 | 32.6  |
|    |   |   |    | A2 | 50.88 | 38.84 | 28.26 | 24.42 | 20.12 | 30.22 |
|    |   |   |    | B1 | 50.12 | 39.44 | 29.2  | 26.44 | 21.18 | 32.32 |
|    |   |   |    | B2 | 49.8  | 38.6  | 28.7  | 25.28 | 18.96 | 31.28 |
| 37 | R | M | 45 | A1 | 52.94 | 42.94 | 31.76 | 29.58 | 25.84 | 35.7  |
|    |   |   |    | A2 | 52.38 | 43.76 | 32.28 | 28.96 | 26.76 | 36.5  |
|    |   |   |    | B1 | 53.02 | 42.04 | 31.24 | 29.9  | 25.42 | 35.44 |
|    |   |   |    | B2 | 52.1  | 41.84 | 33.3  | 30.04 | 24.88 | 37.38 |
| 38 | R | M | 50 | A1 | 54.12 | 43.68 | 33.7  | 30.74 | 26.72 | 36.14 |
|    |   |   |    | A2 | 54.8  | 44.76 | 34.36 | 32.88 | 27.58 | 35.08 |
|    |   |   |    | B1 | 53.98 | 43.88 | 32.46 | 31.06 | 26.28 | 37.1  |
|    |   |   |    | B2 | 53.46 | 44.74 | 33.42 | 30.76 | 25.74 | 35.6  |
| 39 | L | M | 69 | A1 | 55.54 | 44.74 | 32.78 | 29.78 | 26.68 | 36.34 |
|    |   |   |    | A2 | 54.32 | 46.36 | 33.9  | 31.46 | 27.76 | 35.28 |
|    |   |   |    | B1 | 55.48 | 44.06 | 34.74 | 32.58 | 25.84 | 36.62 |
|    |   |   |    | B2 | 54.56 | 45.28 | 31.86 | 29.48 | 27.1  | 37.44 |
| 40 | R | M | 73 | A1 | 53.1  | 45.04 | 33.16 | 30.78 | 27.28 | 36.6  |
|    |   |   |    | A2 | 53.76 | 44.72 | 34.48 | 31.82 | 28.36 | 37.06 |
|    |   |   |    | B1 | 54.72 | 46.48 | 33.5  | 31.2  | 27.48 | 36.04 |
|    |   |   |    | B2 | 54.3  | 45.66 | 32.6  | 29.86 | 26.56 | 38.1  |

|    |   |   |    |    |       |       |       |       |       |       |
|----|---|---|----|----|-------|-------|-------|-------|-------|-------|
| 41 | R | F | 49 | A1 | 48.82 | 36.66 | 28.66 | 25.28 | 21.76 | 32.96 |
|    |   |   |    | A2 | 48    | 37.28 | 27.52 | 26.2  | 20.82 | 31.76 |
|    |   |   |    | B1 | 47.94 | 36.04 | 29.74 | 26.68 | 22.74 | 30.78 |
|    |   |   |    | B2 | 47.38 | 36.8  | 27.08 | 24.38 | 19.62 | 33.88 |
| 42 | L | F | 58 | A1 | 51.06 | 38.7  | 29.66 | 27.48 | 22.9  | 33.28 |
|    |   |   |    | A2 | 49.88 | 38.66 | 30.58 | 28.22 | 22.26 | 34.32 |
|    |   |   |    | B1 | 49.42 | 39.6  | 29.52 | 27.04 | 21.46 | 32.28 |
|    |   |   |    | B2 | 49.04 | 37.78 | 28.78 | 26.4  | 23.22 | 33.64 |
| 43 | L | F | 65 | A1 | 45.18 | 36.56 | 27.86 | 24.68 | 20.72 | 30.08 |
|    |   |   |    | A2 | 44.34 | 35.96 | 28.18 | 25.76 | 19.1  | 31.64 |
|    |   |   |    | B1 | 45.26 | 37.1  | 27.28 | 25.88 | 19.96 | 30.52 |
|    |   |   |    | B2 | 45.92 | 36.04 | 29.14 | 26.72 | 20.88 | 32.74 |
| 44 | L | M | 66 | A1 | 51.32 | 41.3  | 31.82 | 27.76 | 24.44 | 31.96 |
|    |   |   |    | A2 | 52.46 | 39.98 | 29.88 | 26    | 23.22 | 33.02 |
|    |   |   |    | B1 | 53.5  | 41.14 | 30.04 | 27.6  | 25.3  | 32.1  |
|    |   |   |    | B2 | 52.58 | 40.04 | 29.56 | 25.88 | 23.4  | 32.76 |
| 45 | R | F | 69 | A1 | 49.78 | 40.74 | 30.82 | 27.8  | 20.54 | 29.86 |
|    |   |   |    | A2 | 50.06 | 41.74 | 28.96 | 26.54 | 19.26 | 29.1  |
|    |   |   |    | B1 | 41.78 | 39.8  | 29.06 | 27.26 | 20.1  | 30.02 |
|    |   |   |    | B2 | 49.94 | 40.03 | 28.2  | 26.3  | 21.04 | 31.1  |
| 46 | R | M | 57 | A1 | 56.06 | 45.8  | 37.14 | 34.06 | 27.08 | 37.74 |
|    |   |   |    | A2 | 55.86 | 46.7  | 34.06 | 31.92 | 29.88 | 36.56 |
|    |   |   |    | B1 | 55.34 | 45.66 | 36.04 | 32.14 | 27.14 | 37.1  |
|    |   |   |    | B2 | 54.94 | 46.52 | 35.86 | 32.82 | 28.1  | 38.72 |
| 47 | R | F | 63 | A1 | 49.88 | 42.16 | 30.98 | 27.32 | 21.78 | 33.9  |
|    |   |   |    | A2 | 49.12 | 41.26 | 29.14 | 26.04 | 20.92 | 32.14 |
|    |   |   |    | B1 | 50.08 | 41.3  | 31.08 | 28.16 | 21.04 | 34.06 |
|    |   |   |    | B2 | 49.1  | 40.22 | 29.9  | 27.02 | 19.84 | 32.5  |
| 48 | R | F | 56 | A1 | 47.86 | 38.7  | 28.58 | 27.04 | 20.16 | 29.72 |
|    |   |   |    | A2 | 48.04 | 37.38 | 29.76 | 26.86 | 21.16 | 30.02 |
|    |   |   |    | B1 | 47.9  | 38.22 | 28.7  | 25.02 | 21.98 | 31.88 |
|    |   |   |    | B2 | 47.26 | 39.36 | 30.84 | 27.8  | 22.24 | 29.34 |

|    |   |   |    |    |       |       |       |       |       |       |
|----|---|---|----|----|-------|-------|-------|-------|-------|-------|
| 49 | R | M | 42 | A1 | 55.9  | 46.04 | 33.54 | 29.88 | 24.72 | 34.84 |
|    |   |   |    | A2 | 56.7  | 46.78 | 31.26 | 28.9  | 22.96 | 35.12 |
|    |   |   |    | B1 | 55.48 | 45.58 | 32.46 | 28    | 23.8  | 34.3  |
|    |   |   |    | B2 | 55.02 | 47.52 | 30.5  | 27.1  | 22.36 | 33.26 |
| 50 | R | M | 38 | A1 | 53.16 | 42.66 | 34.12 | 30.78 | 24.76 | 36.44 |
|    |   |   |    | A2 | 52.32 | 43.82 | 33.68 | 28.82 | 25.52 | 34.78 |
|    |   |   |    | B1 | 53.6  | 42.08 | 32.98 | 29.84 | 26.7  | 32.98 |
|    |   |   |    | B2 | 54.06 | 42.68 | 33.04 | 30.6  | 24.82 | 34.08 |
| 51 | L | M | 62 | A1 | 59.42 | 48.56 | 39.08 | 34.62 | 29.84 | 41.02 |
|    |   |   |    | A2 | 60.52 | 47.84 | 38.12 | 35.44 | 29.78 | 39.1  |
|    |   |   |    | B1 | 58.96 | 47.2  | 38.74 | 36.22 | 28.9  | 40.08 |
|    |   |   |    | B2 | 60.64 | 48.58 | 37.9  | 35.9  | 30.48 | 41.86 |
