# Supplementary material for: Gender Variation in the Shape of Superior Talar Dome: A Cadaver Measurement Based on Chinese Population
Source: Biomed Res Int. 2018 Jul 4;2018:6087871. doi: 10.1155/2018/6087871 (PMC6057431; doi:10.1155/2018/6087871)
Supplement: Supplementary Materials — The materials of the present study included a supplementary video and a supplementary data, which all are referred to in the manuscript. The supplementary video recorded the measurement process for the talar dome. And the supplementary data is the original measurement results by two observers. [file 6087871.f1.zip]

Archive with 2 entries (2 files):
- 6087871.f1.pdf
- 6087871.f2.mp4
